# Supplementary material for: The value of genotype-specific reference for transcriptome analyses in barley
Source: Life Sci Alliance. 2022 Apr 22;5(8):e202101255. doi: 10.26508/lsa.202101255 (PMC9034525; doi:10.26508/lsa.202101255)
Supplement: Supplementary file 1 [file LSA-2021-01255_TableS1.xlsx]

## Sheet: Table S1
Table S1: Scaffold statistics of Barke amd Morex reference genomes.
Metric	Barke	Morex
Number of scaffolds	8	8
Total size of scaffolds	4201366934	4342738950
Total scaffold length as percentage of assumed genome size (5G)	0.8206	0.8482
Longest scaffold	652551272	675310294
Shortest scaffold	56936560	85026395
Number of scaffolds > 10M nt	8	8
N50	605571303	624247919
L50	4	4
%A	27.515	26.987
%C	21.979	21.645
%G	21.976	21.641
%T	27.532	27.012
Total Number of Ns	40469164	117898431
%N	0.96	2.72
