# Supplementary material for: The value of genotype-specific reference for transcriptome analyses in barley
Source: Life Sci Alliance. 2022 Apr 22;5(8):e202101255. doi: 10.26508/lsa.202101255 (PMC9034525; doi:10.26508/lsa.202101255)
Supplement: Supplementary file 3 [file LSA-2021-01255_TableS3.xlsx]

## Sheet: Table S3
Table S3: Average statistics of Barke read mapping to Barke and Morex genomes using STAR.
Category	Statistics	Barke (genotype-specific ref)	Morex (common ref)
Mapping	Uniquely mapped reads number	107,770,451.15 (89.89%)	99,142,457.6 (82.63%)
	Average mapped length	288.64	279.57
	Number of reads mapped to multiple loci (<10 loci)	3,271,287.2 (2.64%)	3,656,786.55 (3.01%)
	Number of reads mapped to too many loci (<10 loci)	534,171.1 (0.46%)	131,798.65 (0.12%)
	Number of reads unmapped: too many mismatches	0 (0.00%)	0 (0.00%)
	Number of reads unmapped: too short (mapping length <2/3 of read length)	8046584.8 (6.90%)	16700021.9 (14.13%)
	Number of reads unmapped: other	155314.15 (0.12%)	146743.7 (0.12%)
	Number of chimeric reads	0 (0.00%)	0 (0.00%)
Read splices	Number of splices: Total	9.52189e+07	8.58172e+07
	Number of splices: GT/AG	9.39639e+07	8.45656e+07
	Number of splices: GC/AG	1.17927e+06	1.18402e+06
	Number of splices: AT/AC	75746.9	67574.8
	Number of splices: Non-canonical	0	0
Sequence variation	Mismatch rate per base, %	0	0
	Deletion rate per base, %	0.0001	0.0002
	Deletion average length	1.853	3.123
	Insertion rate per base	0	0.0002
	Insertion average length	1.3475	2.667
