# Supplementary material for: The value of genotype-specific reference for transcriptome analyses in barley
Source: Life Sci Alliance. 2022 Apr 22;5(8):e202101255. doi: 10.26508/lsa.202101255 (PMC9034525; doi:10.26508/lsa.202101255)
Supplement: Supplementary file 4 [file LSA-2021-01255_TableS4.xlsx]

## Sheet: Table S4
Table S4: STAR second pass mapping statistics at different mismatch settings.
Barke-ref mapping (allowed max mismatch)	Barke (m=0)	Barke (m=2)		Barke (m=4)			Barke (m=6)
Number of input reads	1.19778e+08	1.19778e+08		1.19778e+08			1.19778e+08
Average input read length	298.25	298.25		298.25			298.25
Uniquely mapped reads number	107,770,451.15 (89.89%)	110,436,414.35 (92.19%)		111,149,168.6 (92.82%)			111,532,732.15 (93.15%)
Average mapped length	288.64	294.906		295.671			296
Number of splices: Total	9.52189e+07	9.95973e+07		1.0042e+08			1.00781e+08
Number of splices: GT/AG	9.39639e+07	9.82871e+07		9.90965e+07			9.94511e+07
Number of splices: GC/AG	1.17927e+06	1.23147e+06		1.24451e+06			1.25021e+06
Number of splices: AT/AC	75746.9	78730.8		79391.4			79716.9
Number of splices: Non-canonical	0	0		0			0
Mismatch rate per base, %	0	0.0011		0.0014			0.0017
Deletion rate per base	0.0001	0.0001		0.0001			0.0001
Deletion average length	1.853	1.8765		1.8905			1.9015
Insertion rate per base	0	0		0			0
Insertion average length	1.3475	1.293		1.301			1.3095
Number of reads mapped to multiple loci	3,271,287.2 (2.64%)	3,349,456.65 (2.70%)		3,367,742.45 (2.72%)			3,375,106.85 (2.72%)
Number of reads mapped to too many loci	534,171.1 (0.46%)	503,661 (0.43%)		505,462.35 (0.43%)			505,385.35 (0.43%)
Number of reads unmapped: too many mismatches	0 (0.00%)	0 (0.00%)		0 (0.00%)			0 (0.00%)
Number of reads unmapped: too short	8,046,584.8 (6.90%)	5,332,962.25 (4.55%)		4,600,120.85 (3.91%)			4,209,269.9 (3.57%)
Number of reads unmapped: other	155,314.15 (0.12%)	155,314.15 (0.12%)		155,314.15 (0.12%)			155,314.15 (0.12%)
Number of chimeric reads	0 (0.00%)	0 (0.00%)		0 (0.00%)			0 (0.00%)
Morex-ref mapping (allowed max mismatch)	Morex (m=0)	Morex (m=2)		Morex (m=4)			Morex (m=6)
Number of input reads	1.19778e+08	1.19778e+08		1.19778e+08			1.19778e+08
Average input read length	298.25	298.25		298.25			298.25
Uniquely mapped reads number	99,142,457.6 (82.63%)	107,619,513 (89.78%)		109,509,789.6 (91.39%)			110,294,053.35 (92.07%)
Average mapped length	279.57	291.344		293.813			294.656
Number of splices: Total	8.58172e+07	9.4716e+07		9.65841e+07			9.72261e+07
Number of splices: GT/AG	8.45656e+07	9.33437e+07		9.51858e+07			9.58169e+07
Number of splices: GC/AG	1.18402e+06	1.30017e+06		1.32537e+06			1.33585e+06
Number of splices: AT/AC	67574.8	72122.7		72918			73346.1
Number of splices: Non-canonical	0	0		0			0
Mismatch rate per base, %	0	0.0022		0.003			0.0035
Deletion rate per base	0.0002	0.0003		0.0003			0.0003
Deletion average length	3.123	3.355		3.453			3.49
Insertion rate per base	0.0002	0.0002		0.0002			0.0002
Insertion average length	2.667	2.896		2.9755			3.0205
Number of reads mapped to multiple loci	3,656,786.55 (3.01%)	4,158,723.5 (3.43%)		4,232,954.1 (3.49%)			42,751,39.5 (3.52%)
Number of reads mapped to too many loci	131,798.65 (0.12%)	103,843.4 (0.09%)		103,854.4 (0.09%)			103,847.15 (0.09%)
Number of reads unmapped: too many mismatches	0 (0.00%)	0 (0.00%)		0 (0.00%)			0 (0.00%)
Number of reads unmapped: too short	16,700,021.9 (14.13%)	7,748,984.8 (6.59%)		5,784,466.6 (4.91%)			4,958,024.7 (4.20%)
Number of reads unmapped: other	146,743.7 (0.12%)	146,743.7 (0.12%)		146,743.7 (0.12%)			146,743.7 (0.12%)
Number of chimeric reads	0 (0.00%)	0 (0.00%)		0 (0.00%)			0 (0.00%)
