# Supplementary material for: The value of genotype-specific reference for transcriptome analyses in barley
Source: Life Sci Alliance. 2022 Apr 22;5(8):e202101255. doi: 10.26508/lsa.202101255 (PMC9034525; doi:10.26508/lsa.202101255)
Supplement: Supplementary file 6 [file LSA-2021-01255_TableS6.xlsx]

## Sheet: Table S6
Table S6: The mis-assembled transcripts filtered at the quality control step.
Transcript category	sRTD (m=0)	sRTD (m=2)	sRTD (m=4)	sRTD (m=6)	cRTD (m=0)	cRTD (m=2)	cRTD (m=4)	cRTD (m=6)
Unstranded	106	135	126	131	123	136	144	147
Non canonical SJ	106	179	302	350	86	2857	4041	4454
Low read support SJ	16436	16456	16509	16524	18407	20543	20747	20837
Redundant	1	1	1	1	0	0	0	0
Fragment	14063	14217	14124	14053	12521	11881	11903	11770
