# Supplementary material for: The value of genotype-specific reference for transcriptome analyses in barley
Source: Life Sci Alliance. 2022 Apr 22;5(8):e202101255. doi: 10.26508/lsa.202101255 (PMC9034525; doi:10.26508/lsa.202101255)
Supplement: Supplementary file 11 [file LSA-2021-01255_TableS11.xlsx]

## Sheet: Table S11
Table S11: Barke RNA-seq read mapping rate to sRTD and cRTD in the transcript quantification with Salmon.
Samples	sRTD	cRTD	sRTD - cRTD
B1	0.758131	0.73633	0.021801
B2	0.808184	0.781078	0.027106
B43	0.808138	0.781117	0.027021
B46	0.815663	0.800674	0.014989
B48	0.830037	0.806577	0.02346
B49	0.825774	0.808622	0.017152
B4	0.797987	0.776261	0.021726
B51	0.824082	0.801608	0.022474
B53	0.813202	0.79128	0.021922
B5	0.809178	0.782414	0.026764
B60	0.842604	0.817032	0.025572
B61	0.811931	0.791737	0.020194
B69	0.842198	0.815525	0.026673
B6	0.820623	0.795846	0.024777
B71	0.853391	0.823436	0.029955
B74	0.855276	0.823988	0.031288
B79	0.863876	0.840396	0.02348
B7	0.819297	0.795049	0.024248
B87	0.856923	0.834896	0.022027
B88	0.846756	0.82732	0.019436
